# Supplementary material
Source: Springer Nature journal article supplement (https://www.springermedizin.de/resource/supplementary/12876_2011_661_MOESM3_ESM.pdf/9437204)

**Population 2**

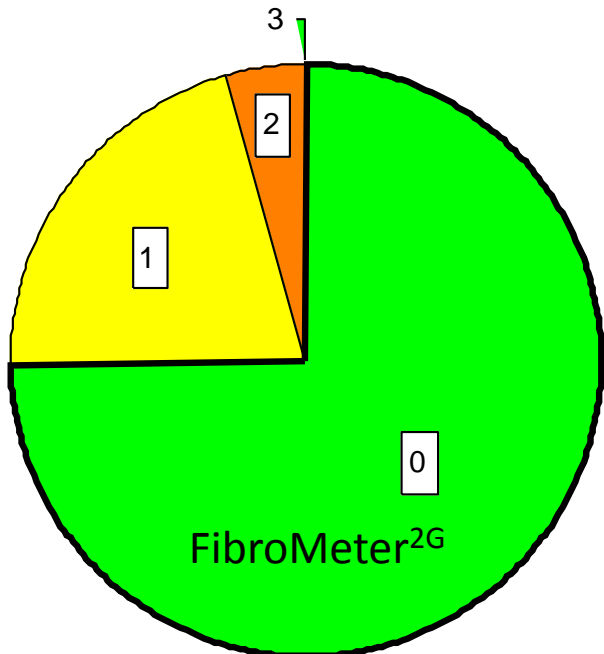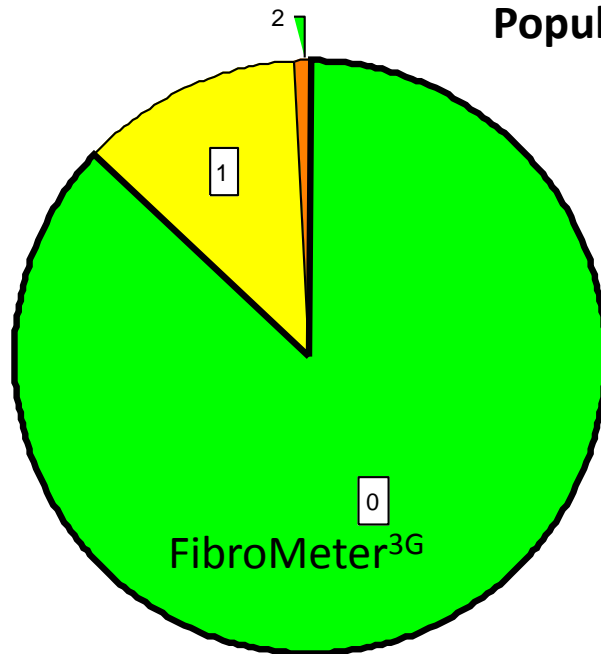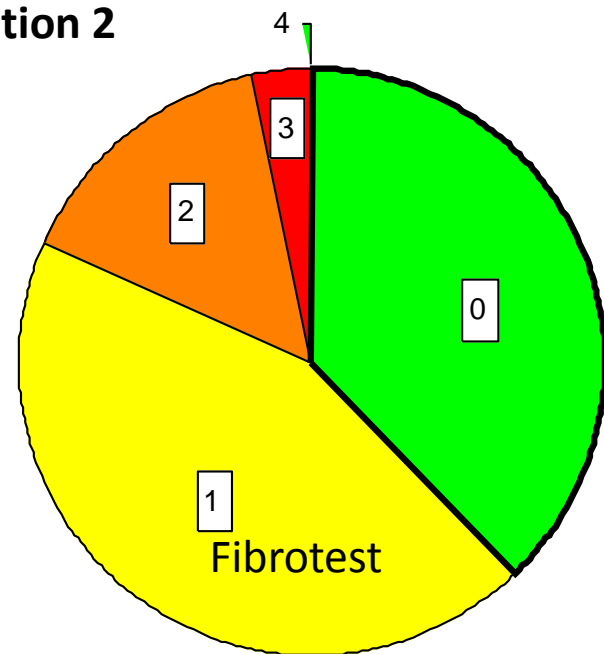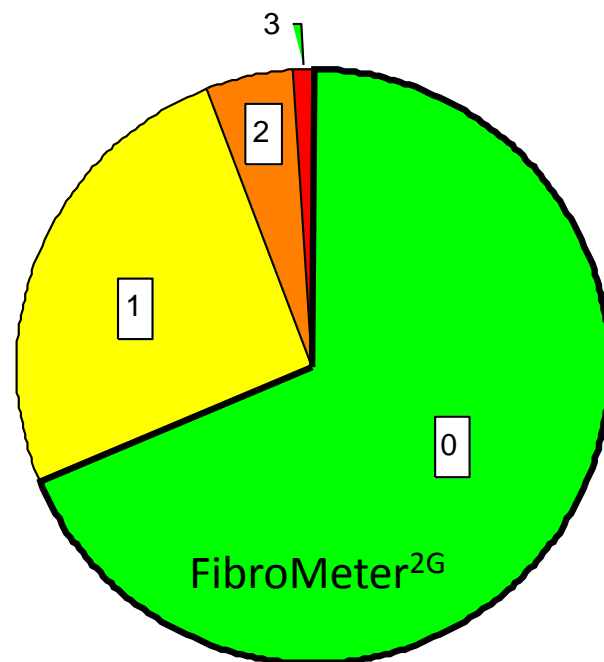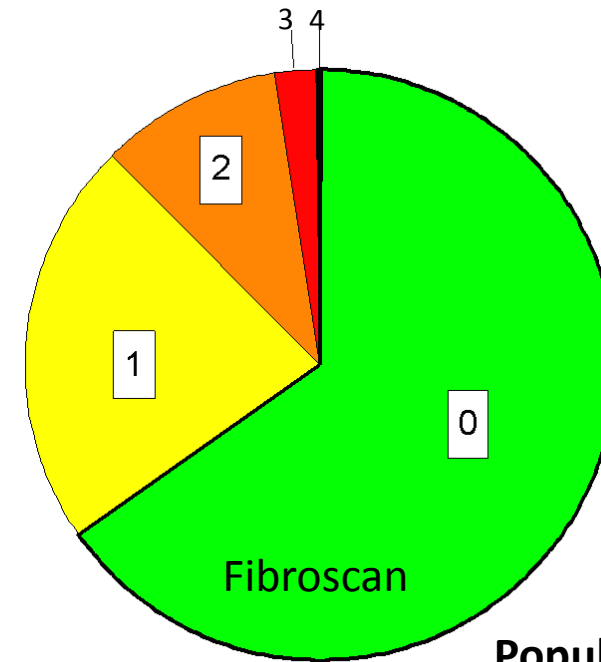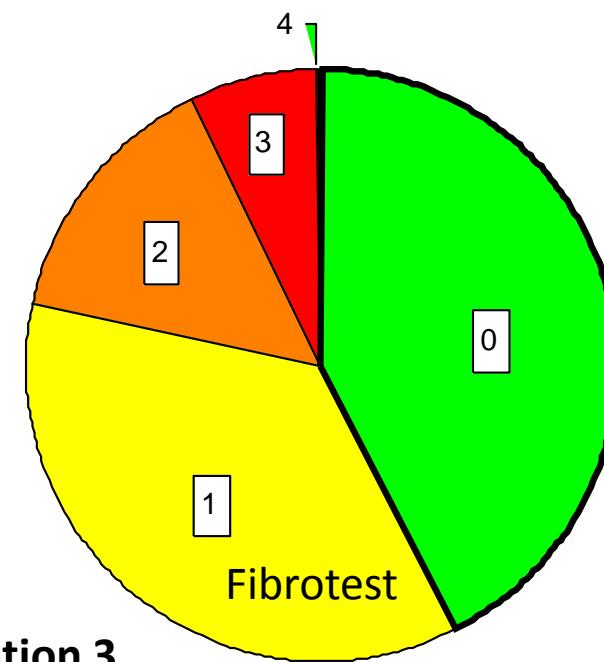

**Population 3**

Supplement: MOESM3 [file 9437204]
